# Supplementary material for: Controlled integration of oligo- and polythiophenes at the molecular scale
Source: Royal Society of Chemistry journal article supplement (doi:10.1039/c4cp02944e), 2014-09-02

Electronic Supplementary Information for

## **Controlled Integration of Oligo- and Polythiophenes at the Molecular Scale**

Nicholas S. Colella,<sup>a</sup> Lei Zhang,<sup>a</sup> Thomas McCarthy-Ward,<sup>b</sup> Stefan C. B. Mannsfeld,<sup>c,d</sup> H. Henning Winter,<sup>a</sup>  
Martin Heeney,<sup>b</sup> James J. Watkins,<sup>\*a</sup> and Alejandro L. Briseno<sup>\*a</sup>

<sup>a</sup> Department of Polymer Science and Engineering, Conte Research Center, University of Massachusetts, 120  
Governors Drive, Amherst, MA, 01002, United States

<sup>b</sup> Department of Chemistry, Imperial College London, London, SW7 2AZ, UK

<sup>c</sup> Dresden University of Technology, 01062 Dresden, Germany

<sup>d</sup> Stanford Synchrotron Radiation Lightsource, Menlo Park, CA, 94025, United States

S1. Atomic force micrographs: phase images of (a) 100% BTTT-3, (b) 87% BTTT-3 / 13% PBTTT, (c) 50% BTTT-3 / 50% PBTTT, (d) 13% BTTT-3 / 87% PBTTT, and (e) 100% PBTTT thin films. Scale bar is 200 nm. Vertical scale is in Å.

(a)

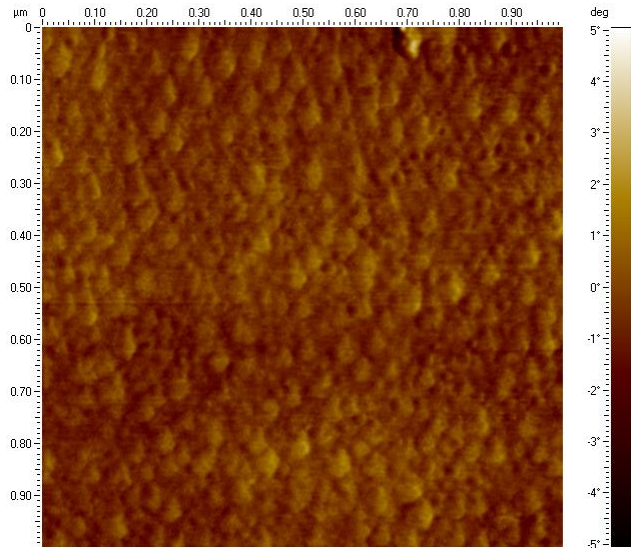

(b)

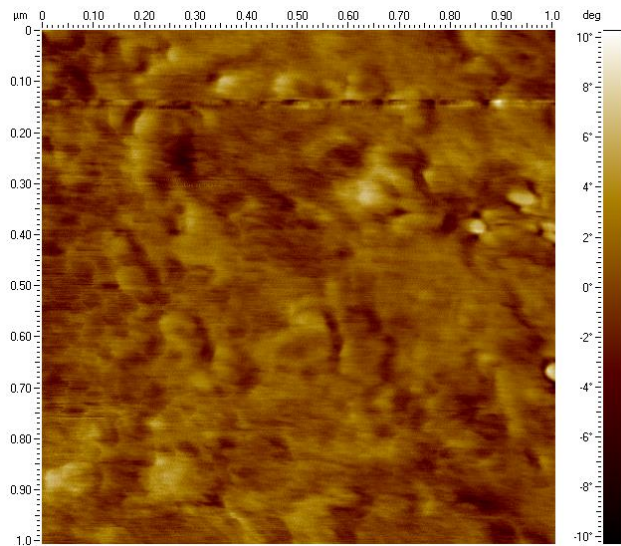

(c)

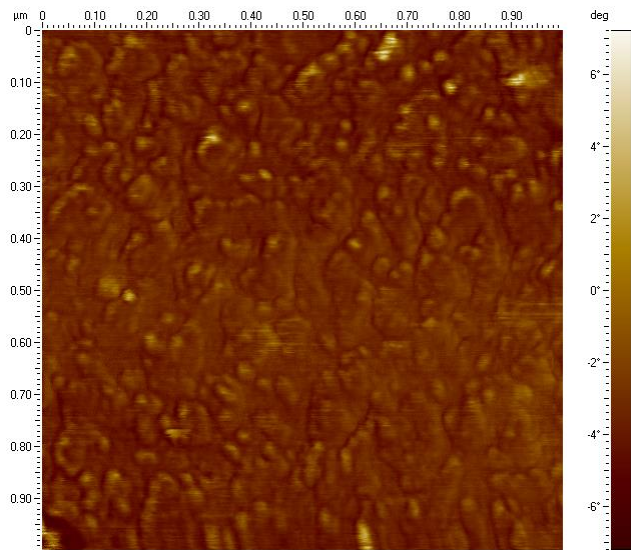

(d)

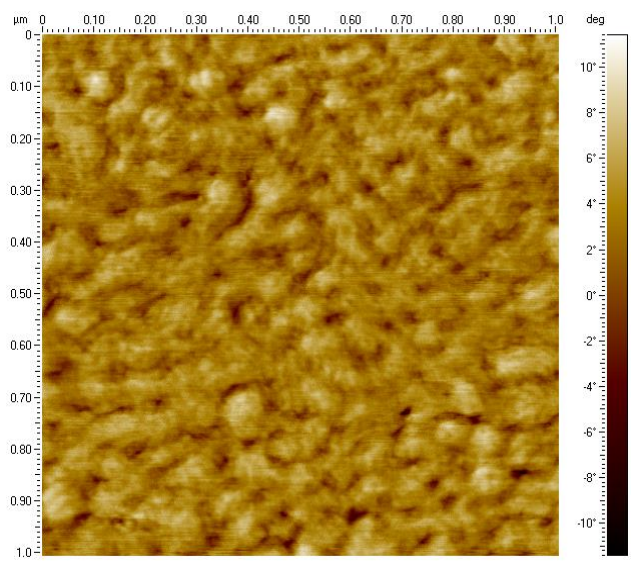

(e)

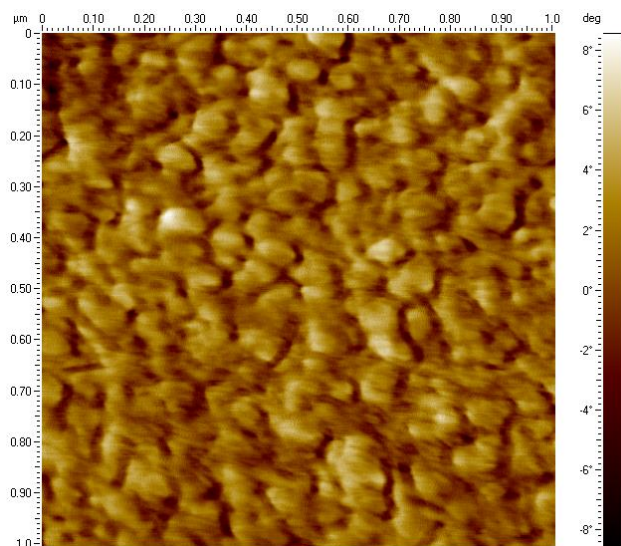

Table S1. RMS Roughness of films

| Film          | Roughness (Rq) (Å) |
|---------------|--------------------|
| <b>BTTT-3</b> | 4.8                |
| <b>1:5</b>    | 9.3                |
| <b>1:1</b>    | 9.4                |
| <b>5:1</b>    | 13.0               |
| <b>PBTTT</b>  | 10.9               |

Figure S2. GPC traces of PBTTT and BTTT-3

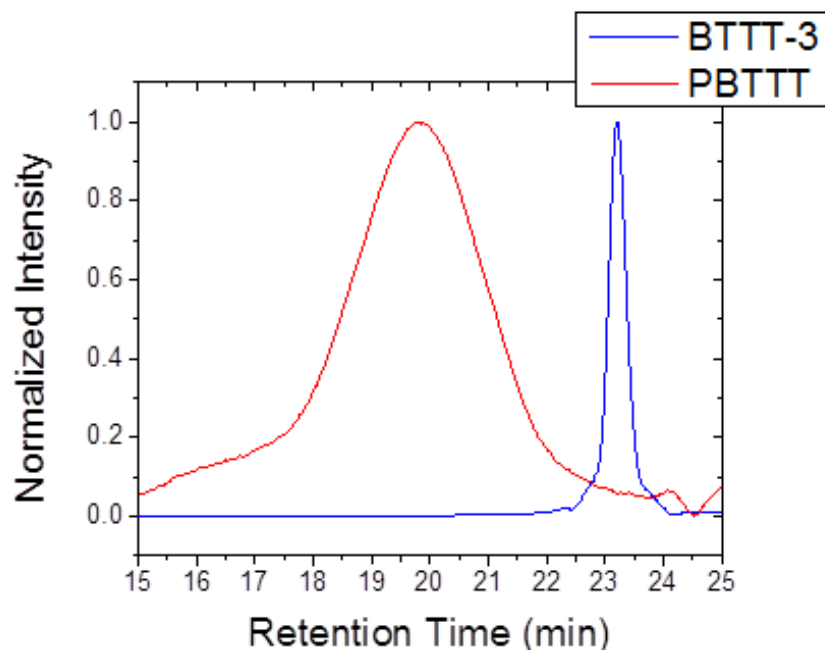

Supplement: c4cp02944e1.pdf [file c4cp02944e1.pdf]
